# Supplementary material for: Redox and ligand-exchange chemistry of chromium(vi/v)-methyl glycoside systems
Source: Royal Society of Chemistry journal article supplement (doi:10.1039/b204280k), 2002-01-01
Supplement: fig3s.doc [file fig3s.doc]

**Figure 3S.** Experimental and simulated X-band EPR spectra of mixtures of (a) Cys:CrVI: Gal1Me = 1:1:100, pH 5.5; *t* = 90 min; (b) CrV(O)(ehba)2]-:Gal1Me = 1:100, pH =5.5, *t* = 12 min; (c ) CrV(O)(ehba)2]-:Gal1Me = 1:100, pH 7.5, *t* = 3 min. *T* = 25°C, frequency  9.67 GHz, mod. ampl. = 0.2 G.
